# Supplementary material for: The developmental basis for scaling of mammalian tooth size
Source: PubMed Central journal article supplement — Proc Natl Acad Sci U S A. 2023 Jun 12;120(25):e2300374120. doi: 10.1073/pnas.2300374120 (PMC10288632; doi:10.1073/pnas.2300374120), 2023-06-12
Supplement: pnas.2300374120.sapp.pdf [file pnas.2300374120.sapp.pdf]

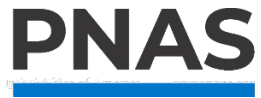

## **Supporting Information for**

### **The developmental basis for scaling of mammalian tooth size**

Mona M. Christensen<sup>1</sup>, Outi Hallikas, Rishi Das Roy, Vilma Väänänen, Otto E. Stenberg, Teemu J. Häkkinen, Jean-Christophe François, Robert J. Asher, Ophir D. Klein, Martin Holzenberger, Jukka Jernvall<sup>1</sup>

<sup>1</sup>To whom correspondence may be addressed. Email: [mona.christensen@helsinki.fi](mailto:mona.christensen@helsinki.fi) or [jernvall@fastmail.fm](mailto:jernvall@fastmail.fm)

#### **This PDF file includes:**

Figures S1 to S3  
Tables S1 to S10  
SI References

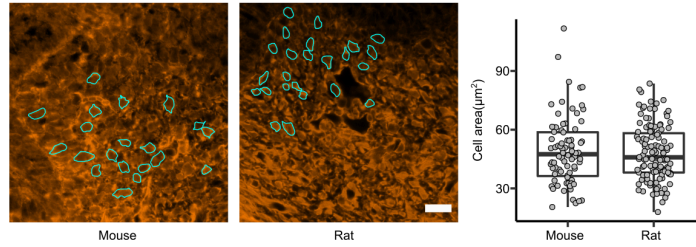

**Fig. S1.** Cell size does not differ between developing rat and mouse molars. Cell size (measured as the perimeter of cells stained with Dil on histological sections) does not differ between rat and mouse molars at bell stage of tooth development (E16 in mouse,  $n = 85$ , E19 in rat,  $n = 126$ ,  $P = 0.665$ , randomization test). Scale bar 50  $\mu\text{m}$ .

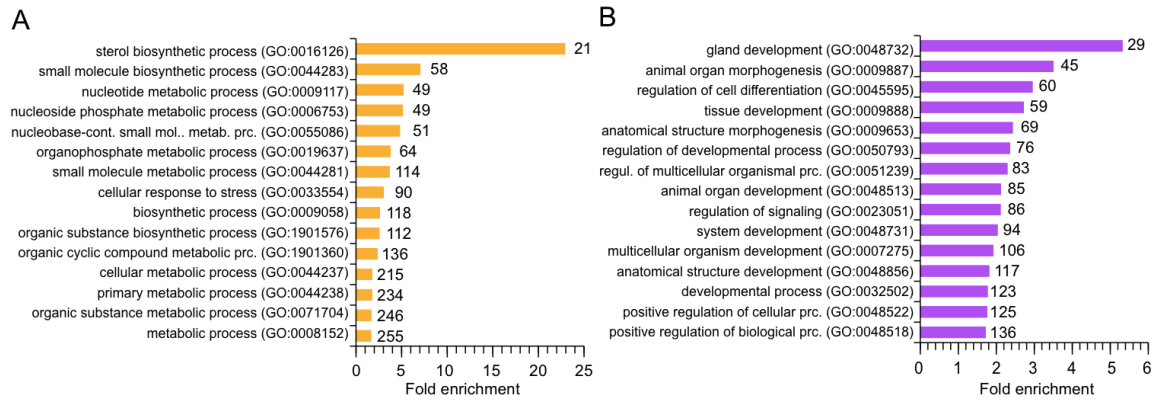

**Fig. S2.** IGF1 protein treatment up- and downregulates distinct gene groups. (A) In IGF1-treated mouse molars, fold enrichment of upregulated GO biological process categories is biased towards metabolic and biosynthesis related genes. (B) In contrast to (A), fold enrichment of downregulated GO biological process categories is biased towards developmental genes. Figures show the top 15 GO categories based on the *P*-value (all false discovery rate corrected values of shown categories are  $P < 10^{-9}$ ). Number of observed genes in each category is shown next to the bars. For padj < 0.05 upregulated and downregulated genes, n = 439 and 268, respectively. See methods for details.

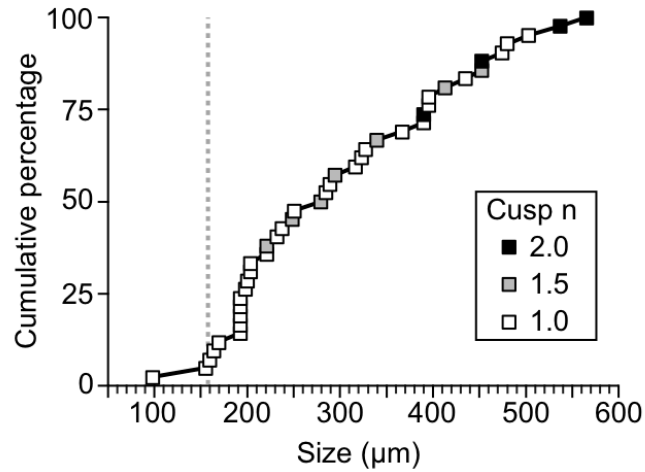

**Fig. S3.** Minimum sizes of cultured mouse molars with activated epithelial Wnt signaling are close to the predicted minimum. Size distribution of 42 teeth obtained from a single molar transplant experiment that was cultured under the kidney capsule [Fig. 3F in (1)]. Gray dashed line shows the predicted minimum tooth size (Fig. 7B, *SI Appendix*, Table S10). Teeth were classified into morphotypes that were clearly single or two cusped, and into an intermediate morphotype that showed an incipient second cusp (cusp  $n = 1.5$ ). Measurements were made from (1).

**Table S1.** The areas, antero-posterior lengths and bucco-lingual widths of *Foxi3* and *Shh* expression areas of developing mouse and rat molars.

| Species | Date   | Sample           | Structure       | Gene  | Area (mm <sup>2</sup> ) | Length (mm) | Width (mm) |
|---------|--------|------------------|-----------------|-------|-------------------------|-------------|------------|
| Mouse   | 120818 | NMRI_E12_t4_3    | Placode         | Foxi3 | 0.0376                  | 0.242       | 0.223      |
| Mouse   | 120818 | NMRI_E12_t3_1    | Placode         | Foxi3 | 0.0410                  | 0.317       | 0.186      |
| Mouse   | 120818 | NMRI_E12_t4_1    | Placode         | Foxi3 | 0.0366                  | 0.224       | 0.227      |
| Mouse   | 120818 | NMRI_E12_t4_2    | Placode         | Foxi3 | 0.0347                  | 0.253       | 0.221      |
| Mouse   | 100718 | NMRI_E12_2       | Placode         | Foxi3 | 0.0380                  | 0.320       | 0.183      |
| Mouse   | 230718 | NMRI_E12_3       | Placode         | Foxi3 | 0.0200                  | 0.214       | 0.137      |
| Mouse   | 230718 | NMRI_E12_1       | Placode         | Foxi3 | 0.0339                  | 0.260       | 0.218      |
| Mouse   | 230718 | NMRI_E12_2       | Placode         | Foxi3 | 0.0346                  | 0.290       | 0.192      |
| Rat     | 100918 | Wistar_E14_2     | Placode         | Foxi3 | 0.0419                  | 0.279       | 0.217      |
| Rat     | 100918 | Wistar_E14_4     | Placode         | Foxi3 | 0.0303                  | 0.302       | 0.149      |
| Rat     | 120818 | Wistar_E14_t10_1 | Placode         | Foxi3 | 0.0290                  | 0.273       | 0.149      |
| Rat     | 120818 | Wistar_E14_t10_2 | Placode         | Foxi3 | 0.0201                  | 0.207       | 0.164      |
| Rat     | 120818 | Wistar_E14_t8_1  | Placode         | Foxi3 | 0.0257                  | 0.295       | 0.138      |
| Rat     | 120818 | Wistar_E14_t8_2  | Placode         | Foxi3 | 0.0353                  | 0.318       | 0.149      |
| Rat     | 120818 | Wistar_E14_t8_3  | Placode         | Foxi3 | 0.0335                  | 0.326       | 0.131      |
| Rat     | 230718 | Wistar_E14_1     | Placode         | Foxi3 | 0.0482                  | 0.273       | 0.250      |
| Rat     | 240220 | Wistar_E14_6     | Placode         | Foxi3 | 0.0299                  | 0.239       | 0.175      |
| Rat     | 240220 | Wistar_E14_1     | Placode         | Foxi3 | 0.0407                  | 0.267       | 0.221      |
| Rat     | 240220 | Wistar_E14_10    | Placode         | Foxi3 | 0.0248                  | 0.220       | 0.181      |
| Rat     | 240220 | Wistar_E14_11    | Placode         | Foxi3 | 0.0361                  | 0.290       | 0.214      |
| Rat     | 240220 | Wistar_E14_2     | Placode         | Foxi3 | 0.0331                  | 0.295       | 0.203      |
| Rat     | 240220 | Wistar_E14_4     | Placode         | Foxi3 | 0.0333                  | 0.271       | 0.166      |
| Rat     | 240220 | Wistar_E14_5     | Placode         | Foxi3 | 0.0361                  | 0.239       | 0.241      |
| Rat     | 240220 | Wistar_E14_7     | Placode         | Foxi3 | 0.0313                  | 0.251       | 0.221      |
| Rat     | 240220 | Wistar_E14_9     | Placode         | Foxi3 | 0.0349                  | 0.228       | 0.241      |
| Mouse   | 130715 | NMRI_E12_4       | Initiation knot | Shh   | 0.0024                  | 0.065       | 0.063      |
| Mouse   | 120818 | NMRI_E12_t2_1    | Initiation knot | Shh   | 0.0030                  | 0.061       | 0.069      |
| Mouse   | 120818 | NMRI_E12_t2_2    | Initiation knot | Shh   | 0.0031                  | 0.068       | 0.067      |
| Mouse   | 290216 | NMRI_E12_1       | Initiation knot | Shh   | 0.0015                  | 0.051       | 0.048      |
| Mouse   | 290216 | NMRI_E12_2       | Initiation knot | Shh   | 0.0012                  | 0.050       | 0.042      |
| Mouse   | 230718 | NMRI_E12_2       | Initiation knot | Shh   | 0.0026                  | 0.062       | 0.067      |
| Mouse   | 230718 | NMRI_E12_3       | Initiation knot | Shh   | 0.0026                  | 0.058       | 0.067      |
| Mouse   | 290216 | NMRI_E12_3       | Initiation knot | Shh   | 0.0024                  | 0.065       | 0.057      |
| Mouse   | 290216 | NMRI_E12_5       | Initiation knot | Shh   | 0.0017                  | 0.048       | 0.054      |
| Rat     | 100918 | Wistar_E14_5     | Initiation knot | Shh   | 0.0064                  | 0.102       | 0.087      |
| Rat     | 100918 | Wistar_E14_6     | Initiation knot | Shh   | 0.0053                  | 0.096       | 0.080      |
| Rat     | 100918 | Wistar_E14_7     | Initiation knot | Shh   | 0.0060                  | 0.104       | 0.085      |
| Rat     | 100918 | Wistar_E14_8     | Initiation knot | Shh   | 0.0072                  | 0.107       | 0.095      |
| Rat     | 100918 | Wistar_E14_9     | Initiation knot | Shh   | 0.0066                  | 0.110       | 0.089      |
| Rat     | 120818 | Wistar_E14_t6_1  | Initiation knot | Shh   | 0.0038                  | 0.090       | 0.065      |

| Species | Date   | Sample          | Structure           | Gene | Area (mm <sup>2</sup> ) | Length (mm) | Width (mm) |
|---------|--------|-----------------|---------------------|------|-------------------------|-------------|------------|
| Rat     | 120818 | Wistar_E14_t6_3 | Initiation knot     | Shh  | 0.0072                  | 0.119       | 0.089      |
| Rat     | 120818 | Wistar_E14_t7_1 | Initiation knot     | Shh  | 0.0021                  | 0.067       | 0.052      |
| Rat     | 120818 | Wistar_E14_t7_3 | Initiation knot     | Shh  | 0.0043                  | 0.092       | 0.070      |
| Rat     | 140116 | Wistar_E14_4    | Initiation knot     | Shh  | 0.0030                  | 0.074       | 0.064      |
| Rat     | 230718 | Wistar_E14_1    | Initiation knot     | Shh  | 0.0077                  | 0.122       | 0.090      |
| Mouse   | 140116 | NMRI_E14_X      | Primary enamel knot | Shh  | 0.0133                  | 0.184       | 0.100      |
| Mouse   | 140116 | NMRI_E14_Y      | Primary enamel knot | Shh  | 0.0146                  | 0.167       | 0.121      |
| Mouse   | 251115 | NMRI_E14_1      | Primary enamel knot | Shh  | 0.0120                  | 0.201       | 0.089      |
| Mouse   | 251115 | NMRI_E14_9      | Primary enamel knot | Shh  | 0.0227                  | 0.205       | 0.158      |
| Mouse   | 290216 | NMRI_E14_1      | Primary enamel knot | Shh  | 0.0210                  | 0.230       | 0.130      |
| Mouse   | 290216 | NMRI_E14_3      | Primary enamel knot | Shh  | 0.0118                  | 0.197       | 0.084      |
| Rat     | 290216 | Wistar_E16_1    | Primary enamel knot | Shh  | 0.0273                  | 0.335       | 0.116      |
| Rat     | 290216 | Wistar_E16_5    | Primary enamel knot | Shh  | 0.0410                  | 0.442       | 0.124      |
| Rat     | 290216 | Wistar_E16_4    | Primary enamel knot | Shh  | 0.0380                  | 0.432       | 0.132      |

**Table S2.** Tooth germ growth and increase in complexity from cap stage onwards. Growth is tabulated as the occlusal area, antero-posterior length, and bucco-lingual width. Complexity is tabulated as OPCR values. The mouse E19 and rat E21 are marked as P0.

| Species | Date   | Sample        | Days after placode | Tooth size (mm <sup>2</sup> ) | Length (mm) | Width (mm) | OPCR |
|---------|--------|---------------|--------------------|-------------------------------|-------------|------------|------|
| Mouse   | 250119 | NMRI_E14_3    | 2                  | 0.0556                        | 0.448       | 0.164      | -    |
| Mouse   | 250119 | NMRI_E14_4    | 2                  | 0.0524                        | 0.458       | 0.158      | 15.8 |
| Mouse   | 250119 | NMRI_E14_5    | 2                  | 0.0535                        | 0.446       | 0.158      | 16.3 |
| Mouse   | 271114 | NMRI_E15_a    | 3                  | 0.0570                        | 0.482       | 0.164      | 14.8 |
| Mouse   | 271114 | NMRI_E15_b    | 3                  | 0.0619                        | 0.451       | 0.192      | 15.4 |
| Mouse   | 271114 | NMRI_E15_c    | 3                  | 0.0552                        | 0.447       | 0.164      | 12.5 |
| Mouse   | 110618 | NMRI_E16_a    | 4                  | 0.1141                        | 0.600       | 0.272      | 17.0 |
| Mouse   | 110618 | NMRI_E16_b    | 4                  | 0.1058                        | 0.581       | 0.274      | 16.3 |
| Mouse   | 110618 | NMRI_E16_c    | 4                  | 0.1218                        | 0.585       | 0.300      | 16.3 |
| Mouse   | 270815 | NMRI_E16_x    | 4                  | 0.0899                        | 0.505       | 0.254      | 13.8 |
| Mouse   | 270815 | NMRI_E16_y    | 4                  | 0.0786                        | 0.497       | 0.224      | 10.0 |
| Mouse   | 210615 | NMRI_E17_x    | 5                  | 0.2001                        | 0.708       | 0.417      | 32.9 |
| Mouse   | 210615 | NMRI_E17_y    | 5                  | 0.2284                        | 0.750       | 0.431      | 29.5 |
| Mouse   | 210615 | NMRI_E17_z    | 5                  | 0.1807                        | 0.683       | 0.381      | 29.3 |
| Mouse   | 021020 | NMRI_P0_1     | 7                  | 0.5248                        | 1.158       | 0.623      | 57.1 |
| Mouse   | 021020 | NMRI_P0_5     | 7                  | 0.4776                        | 1.104       | 0.585      | 57.0 |
| Mouse   | 021020 | NMRI_P0_3     | 7                  | 0.5017                        | 1.143       | 0.579      | 55.6 |
| Mouse   | 240620 | NMRI_P2_5     | 9                  | 0.6204                        | 1.221       | 0.642      | 51.1 |
| Mouse   | 240620 | NMRI_P2_1     | 9                  | 0.6163                        | 1.250       | 0.639      | -    |
| Mouse   | 240620 | NMRI_P2_3     | 9                  | 0.6118                        | 1.227       | 0.636      | 52.4 |
| Mouse   | 300620 | NMRI_P4_5     | 11                 | 0.8460                        | 1.397       | 0.764      | 54.6 |
| Mouse   | 300620 | NMRI_P4_11    | 11                 | 0.7875                        | 1.410       | 0.711      | 55.9 |
| Mouse   | 300620 | NMRI_P4_1     | 11                 | 0.7895                        | 1.374       | 0.729      | 46.5 |
| Mouse   | 060720 | NMRI_P6_1     | 13                 | 0.8180                        | 1.377       | 0.747      | 57.8 |
| Mouse   | 060720 | NMRI_P6_3     | 13                 | 0.8607                        | 1.407       | 0.780      | 49.3 |
| Mouse   | 060720 | NMRI_P6_5     | 13                 | 0.8984                        | 1.391       | 0.810      | 49.9 |
| Rat     | 051018 | Wistar_E16_3  | 2                  | 0.1069                        | 0.566       | 0.266      | 9.1  |
| Rat     | 181014 | Wistar_E16_2  | 2                  | 0.1116                        | 0.635       | 0.261      | 10.9 |
| Rat     | 181014 | Wistar_E16_7  | 2                  | 0.1105                        | 0.633       | 0.294      | 9.4  |
| Rat     | 210216 | Wistar_E16_4  | 2                  | 0.0869                        | 0.566       | 0.233      | 14.0 |
| Rat     | 270914 | Wistar_E17_7  | 3                  | 0.1094                        | 0.627       | 0.279      | 9.1  |
| Rat     | 270914 | Wistar_E17_10 | 3                  | 0.1065                        | 0.633       | 0.294      | 10.6 |
| Rat     | 270914 | Wistar_E17_x  | 3                  | 0.1084                        | 0.624       | 0.234      | 12.3 |
| Rat     | 190618 | Wistar_E18_2  | 4                  | 0.2411                        | 0.891       | 0.405      | 12.8 |
| Rat     | 190618 | Wistar_E18_3  | 4                  | 0.2041                        | 0.825       | 0.369      | 11.5 |
| Rat     | 190618 | Wistar_E18_6  | 4                  | 0.2322                        | 0.867       | 0.426      | 11.1 |
| Rat     | 221014 | Wistar_E19_1  | 5                  | 0.3913                        | 1.068       | 0.567      | 28.3 |
| Rat     | 221014 | Wistar_E19_2  | 5                  | 0.4591                        | 1.122       | 0.633      | 31.6 |
| Rat     | 160119 | Wistar_E19_3  | 5                  | 0.4398                        | 1.107       | 0.606      | 32.6 |
| Rat     | 220616 | Wistar_E19_x  | 5                  | 0.8180                        | 1.412       | 0.804      | 37.3 |

| Species | Date   | Sample       | Days after placode | Tooth size (mm <sup>2</sup> ) | Length (mm) | Width (mm) | OPCR |
|---------|--------|--------------|--------------------|-------------------------------|-------------|------------|------|
| Rat     | 011215 | Wistar_E20_3 | 6                  | 0.9319                        | 1.515       | 0.843      | 43.3 |
| Rat     | 011215 | Wistar_E20_x | 6                  | 0.9458                        | 1.488       | 0.867      | 42.5 |
| Rat     | 011215 | Wistar_E20_y | 6                  | 1.0980                        | 1.575       | 0.927      | 45.0 |
| Rat     | 270421 | Wistar_P0_1  | 7                  | 1.9773                        | 2.148       | 1.224      | 56.3 |
| Rat     | 280421 | Wistar_P1_1  | 8                  | 2.4448                        | 2.352       | 1.388      | 59.8 |
| Rat     | 280421 | Wistar_P1_2  | 8                  | 2.5100                        | 2.488       | 1.308      | 63.1 |
| Rat     | 290421 | Wistar_P2_2  | 9                  | 3.0075                        | 2.632       | 1.472      | 64.6 |
| Rat     | 290421 | Wistar_P2_1  | 9                  | 3.1956                        | 2.648       | 1.584      | 65.9 |
| Rat     | 290421 | Wistar_P2_3  | 9                  | 3.3538                        | 2.672       | 1.601      | 64.1 |
| Rat     | 300421 | Wistar_P3_2  | 10                 | 3.5497                        | 2.836       | 1.632      | 69.8 |
| Rat     | 300421 | Wistar_P3_1  | 10                 | 3.5770                        | 2.764       | 1.712      | 67.1 |
| Rat     | 300421 | Wistar_P3_3  | 10                 | 3.4811                        | 2.715       | 1.655      | 65.6 |
| Rat     | 060715 | Wistar_P5_1  | 12                 | 3.3949                        | 2.776       | 1.600      | 68.0 |
| Rat     | 060715 | Wistar_P5_2  | 12                 | 3.4157                        | 2.700       | 1.648      | 62.9 |



**Table S3.** Tooth size and spacing of the secondary enamel knots detected using *Fgf4* expression (patterning area) in mouse and rat molars.

| Species/<br>Genotype | Date   | Sample       | Tooth size<br>(mm <sup>2</sup> ) | Patterning area<br>(mm <sup>2</sup> ) |
|----------------------|--------|--------------|----------------------------------|---------------------------------------|
| Mouse                | 110116 | NMRI_E16_1   | 0.2587                           | 0.1426                                |
| Mouse                | 110116 | NMRI_E16_2   | 0.2176                           | 0.1268                                |
| Mouse                | 110116 | NMRI_E16_10  | 0.2809                           | 0.1374                                |
| Mouse                | 130715 | NMRI_E17_1   | 0.2636                           | 0.1511                                |
| Mouse                | 130715 | NMRI_E17_6   | 0.2555                           | 0.1422                                |
| Mouse                | 130715 | NMRI_E17_7   | 0.2235                           | 0.1227                                |
| Mouse                | 130715 | NMRI_E17_14  | 0.2294                           | 0.1229                                |
| Mouse                | 130715 | NMRI_E17_X   | 0.2188                           | 0.1341                                |
| Rat                  | 190115 | Wistar_E19_1 | 0.4553                           | 0.2474                                |
| Rat                  | 190115 | Wistar_E19_2 | 0.4267                           | 0.2371                                |
| Rat                  | 190115 | Wistar_E19_6 | 0.3810                           | 0.2070                                |
| Rat                  | 151214 | Wistar_E19_3 | -                                | 0.2752                                |
| Rat                  | 080822 | Wistar_E19_1 | 0.3402                           | 0.1887                                |
| Rat                  | 080822 | Wistar_E19_2 | 0.3546                           | 0.1958                                |
| Rat                  | 080822 | Wistar_E19_5 | 0.3787                           | 0.2103                                |
| Rat                  | 080822 | Wistar_E19_6 | 0.3608                           | 0.1734                                |
| Rat                  | 080822 | Wistar_E19_8 | 0.3933                           | 0.1891                                |

**Table S4.** Expression of *Igf*-pathway related genes in rat and mouse molars. Genes with read counts below ten in both the species are not listed (e.g., *Igfbp1*, *Ins1*, *Ins2*). Bolded genes have a higher expression in the rat relative to the mouse molars at  $\text{padj} < 0.05$ , and bolded genes in brackets have a lower expression in the rat relative to the mouse molars at  $\text{padj} < 0.05$ .

| Gene             | Gene ID mouse (ENSMUSG 000000) | Gene ID rat (ENSRNOG 000000) | Stage | Mouse mean count | Rat mean count | log2 Fold Change | pvalue   | padj     |
|------------------|--------------------------------|------------------------------|-------|------------------|----------------|------------------|----------|----------|
| <b>Igf1</b>      | 20053                          | 04517                        | Bud   | 1254.63          | 5900.52        | 2.234            | 1.16E-22 | 1.45E-21 |
| <b>Igf1</b>      |                                |                              | Cap   | 1671.01          | 6559.41        | 1.973            | 5.72E-17 | 4.84E-16 |
| <b>Igf1</b>      |                                |                              | Bell  | 1588.43          | 5678.52        | 1.838            | 7.69E-16 | 5.04E-15 |
| Igf1r            | 05533                          | 14187                        | Bud   | 5972.62          | 5981.88        | 0.002            | 0.978851 | 0.984267 |
| Igf1r            |                                |                              | Cap   | 5332.95          | 5544.75        | 0.056            | 0.501891 | 0.561991 |
| Igf1r            |                                |                              | Bell  | 5619.78          | 5807.20        | 0.046            | 0.565733 | 0.619579 |
| Igf2             | 48583                          | 20369                        | Bud   | 62517.93         | 69737.80       | 0.158            | 0.418821 | 0.486138 |
| <b>Igf2</b>      |                                |                              | Cap   | 45351.26         | 76597.68       | 0.756            | 0.000177 | 0.000389 |
| <b>Igf2</b>      |                                |                              | Bell  | 39471.46         | 73208.88       | 0.891            | 0.000005 | 0.000012 |
| <b>Igf2r</b>     | 23830                          | 14997                        | Bud   | 6197.70          | 9813.38        | 0.663            | 0.000003 | 0.000008 |
| <b>Igf2r</b>     |                                |                              | Cap   | 7006.37          | 12481.32       | 0.833            | 1.31E-08 | 4.87E-08 |
| <b>Igf2r</b>     |                                |                              | Bell  | 5796.93          | 12306.30       | 1.086            | 1.82E-14 | 1.07E-13 |
| <b>Igfbp2</b>    | 39323                          | 16957                        | Bud   | 1885.02          | 4697.42        | 1.318            | 2.76E-24 | 3.87E-23 |
| <b>Igfbp2</b>    |                                |                              | Cap   | 2571.93          | 6476.31        | 1.333            | 2.20E-23 | 2.94E-22 |
| <b>Igfbp2</b>    |                                |                              | Bell  | 2300.23          | 6638.37        | 1.528            | 3.10E-32 | 6.00E-31 |
| <b>Igfbp3</b>    | 20427                          | 61910                        | Bud   | 2211.35          | 8035.82        | 1.862            | 8.11E-27 | 1.34E-25 |
| <b>Igfbp3</b>    |                                |                              | Cap   | 3481.70          | 8819.48        | 1.341            | 7.74E-14 | 4.94E-13 |
| <b>Igfbp3</b>    |                                |                              | Bell  | 3084.31          | 7767.38        | 1.332            | 1.61E-14 | 9.54E-14 |
| Igfbp4           | 17493                          | 10635                        | Bud   | 8734.64          | 7888.97        | -0.147           | 0.520044 | 0.585184 |
| Igfbp4           |                                |                              | Cap   | 8662.03          | 9265.02        | 0.097            | 0.680564 | 0.726755 |
| <b>Igfbp4</b>    |                                |                              | Bell  | 7878.39          | 12023.91       | 0.610            | 0.007524 | 0.012184 |
| <b>Igfbp5</b>    | 26185                          | 17206                        | Bud   | 27115.27         | 95790.36       | 1.821            | 4.70E-24 | 6.47E-23 |
| <b>Igfbp5</b>    |                                |                              | Cap   | 27072.84         | 121984.83      | 2.172            | 1.86E-31 | 4.25E-30 |
| <b>Igfbp5</b>    |                                |                              | Bell  | 33712.75         | 115067.75      | 1.771            | 7.55E-23 | 8.47E-22 |
| <b>Igfbp6</b>    | 23046                          | 10977                        | Bud   | 9.02             | 140.48         | 4.020            | 2.51E-27 | 4.28E-26 |
| <b>Igfbp6</b>    |                                |                              | Cap   | 6.02             | 166.83         | 4.947            | 4.61E-34 | 1.24E-32 |
| <b>Igfbp6</b>    |                                |                              | Bell  | 9.72             | 230.30         | 4.634            | 1.35E-37 | 3.58E-36 |
| Igf2bp1          | 13415                          | 06122                        | Bud   | 2824.98          | 3075.89        | 0.123            | 0.312116 | 0.376078 |
| <b>Igf2bp1</b>   |                                |                              | Cap   | 1304.36          | 2190.09        | 0.748            | 3.11E-09 | 1.24E-08 |
| <b>Igf2bp1</b>   |                                |                              | Bell  | 970.89           | 1728.21        | 0.830            | 1.29E-11 | 5.95E-11 |
| Igf2bp2          | 33581                          | 25946                        | Bud   | 5792.42          | 5142.98        | -0.172           | 0.080936 | 0.114335 |
| <b>(Igf2bp2)</b> |                                |                              | Cap   | 4906.97          | 3952.46        | -0.312           | 0.002172 | 0.004004 |
| <b>(Igf2bp2)</b> |                                |                              | Bell  | 4539.81          | 3445.87        | -0.398           | 0.000054 | 0.000119 |
| <b>(Igf2bp3)</b> | 29814                          | 09052                        | Bud   | 2513.81          | 1973.58        | -0.351           | 0.000474 | 0.001014 |
| <b>(Igf2bp3)</b> |                                |                              | Cap   | 1881.21          | 1459.65        | -0.365           | 0.000467 | 0.000959 |
| <b>(Igf2bp3)</b> |                                |                              | Bell  | 1622.97          | 1141.57        | -0.507           | 6.18E-07 | 0.000002 |
| <b>Igfbp11</b>   | 35551                          | 11320                        | Bud   | 3.46             | 29.50          | 3.638            | 1.53E-11 | 7.96E-11 |
| Igfbp11          |                                |                              | Cap   | 39.46            | 28.03          | -0.469           | 0.316667 | 0.376315 |

| Gene             | Gene ID<br>mouse<br>(ENSMUSG<br>000000) | Gene ID<br>rat<br>(ENSRNOG<br>000000) | Stage | Mouse<br>mean<br>count | Rat<br>mean<br>count | log2<br>Fold<br>Change | pvalue   | padj     |
|------------------|-----------------------------------------|---------------------------------------|-------|------------------------|----------------------|------------------------|----------|----------|
| <b>(lgfbpl1)</b> |                                         |                                       | Bell  | 186.31                 | 24.84                | -2.941                 | 7.55E-11 | 3.24E-10 |
| Igfals           | 46070                                   | 15061                                 | Bud   | 4.39                   | 4.78                 | 0.170                  | 0.885116 | 0.907325 |
| Igfals           |                                         |                                       | Cap   | 13.54                  | 4.47                 | -1.663                 | 0.165635 | 0.211764 |
| <b>(Igfals)</b>  |                                         |                                       | Bell  | 15.07                  | 2.77                 | -2.681                 | 0.024600 | 0.036497 |
| <b>(Insr)</b>    | 05534                                   | 29986                                 | Bud   | 2531.52                | 1219.10              | -1.054                 | 4.47E-23 | 5.75E-22 |
| <b>(Insr)</b>    |                                         |                                       | Cap   | 2780.62                | 1169.19              | -1.250                 | 8.98E-30 | 1.86E-28 |
| <b>(Insr)</b>    |                                         |                                       | Bell  | 2468.56                | 1114.99              | -1.146                 | 6.96E-27 | 9.93E-26 |

**Table S5.** Tooth size and spacing of the secondary enamel knots (patterning area) in Fucci-red mouse molars cultured in the presence and absence of IGF1 protein. Teeth were measured when at least five secondary enamel knots were visible.

| Sample | Starting date | Treatment | Days <i>ex vivo</i> | Tooth size (mm <sup>2</sup> ) | Patterning area (mm <sup>2</sup> ) |
|--------|---------------|-----------|---------------------|-------------------------------|------------------------------------|
| 1R     | 080221        | Control   | 6                   | 0.5159                        | 0.1018                             |
| 5R     | 080221        | Control   | 6                   | 0.6144                        | 0.1536                             |
| 2R     | 110321        | Control   | 5                   | 0.3642                        | 0.1162                             |
| 1L     | 110321        | Control   | 5                   | 0.4273                        | 0.1243                             |
| 6L     | 070421        | Control   | 5                   | 0.2478                        | 0.0806                             |
| 5R     | 070421        | Control   | 5                   | 0.3396                        | 0.0948                             |
| 1R     | 070421        | Control   | 5                   | 0.3450                        | 0.1198                             |
| 3R     | 070421        | Control   | 5                   | 0.3525                        | 0.0974                             |
| 2L     | 070421        | Control   | 5                   | 0.3673                        | 0.1146                             |
| 9L     | 110622        | Control   | 5                   | 0.3124                        | 0.0800                             |
| 7R     | 110622        | Control   | 6                   | 0.3800                        | 0.1303                             |
| 1L     | 080221        | IGF1      | 6                   | 0.6230                        | 0.1897                             |
| 6R     | 080221        | IGF1      | 6                   | 0.6815                        | 0.1889                             |
| 4R     | 080221        | IGF1      | 6                   | 0.8405                        | 0.3074                             |
| 2L     | 110321        | IGF1      | 5                   | 0.5230                        | 0.1769                             |
| 6R     | 110622        | IGF1      | 5                   | 0.3271                        | 0.1285                             |
| 5R     | 110622        | IGF1      | 5                   | 0.3612                        | 0.1250                             |
| 4R     | 110622        | IGF1      | 5                   | 0.4110                        | 0.1343                             |
| 8L     | 110622        | IGF1      | 6                   | 0.4582                        | 0.1716                             |
| 1L     | 110622        | IGF1      | 5                   | 0.4917                        | 0.2335                             |

**Table S6.** Tooth size and the spacing of the secondary enamel knots (patterning area) detected using *Fgf4*-expression (patterning area) in mouse and rat molars.

| Species/<br>Genotype | Date   | Sample         | Tooth size<br>(mm <sup>2</sup> ) | Patterning area<br>(mm <sup>2</sup> ) |
|----------------------|--------|----------------|----------------------------------|---------------------------------------|
| Mouse/IGF1R_KO       | 270121 | IGF1R_E18_KO_1 | 0.1823                           | 0.0932                                |
| Mouse/IGF1R_KO       | 270121 | IGF1R_E18_KO_2 | 0.1938                           | 0.1112                                |
| Mouse/IGF1R_KO       | 280622 | IGF1R_E18_KO_3 | 0.1546                           | 0.0841                                |
| Mouse/IGF1R_KO       | 280622 | IGF1R_E18_KO_4 | 0.1272                           | 0.0504                                |
| Mouse/IGF1R_KO       | 280622 | IGF1R_E18_KO_7 | 0.1508                           | 0.0703                                |
| Mouse/IGF1R_KO       | 280622 | IGF1R_E18_KO_8 | 0.1524                           | 0.0820                                |
| Mouse/IGF1R_WT       | 270121 | IGF1R_E17_WT_6 | 0.2824                           | 0.1655                                |
| Mouse/IGF1R_WT       | 030321 | IGF1R_E17_WT_5 | 0.2563                           | 0.1294                                |
| Mouse/IGF1R_WT       | 280622 | IGF1R_E17_WT_8 | 0.2526                           | 0.1324                                |
| Mouse/IGF1R_WT       | 280622 | IGF1R_E17_WT_6 | 0.2645                           | 0.1352                                |

**Table S7.** The effect of IGF1 treatment on expression of genes known to be required for normal tooth development (2) of mouse molars. The genes in bold have expression level changes at padj < 0.05, all downregulation.

| Gene           | Gene ID             | baseMean | log2FoldChange | pvalue   | padj     |
|----------------|---------------------|----------|----------------|----------|----------|
| <b>Shh</b>     | ENSMUSG00000002633  | 158.008  | -1.331553      | 1.86E-08 | 0.000002 |
| <b>Spry2</b>   | ENSMUSG000000022114 | 203.119  | -0.899376      | 0.000003 | 0.000176 |
| <b>Lef1</b>    | ENSMUSG000000027985 | 651.643  | -0.668914      | 0.000004 | 0.000240 |
| <b>Fgf3</b>    | ENSMUSG000000031074 | 78.791   | -1.745747      | 0.000006 | 0.000349 |
| <b>Pdgfra</b>  | ENSMUSG000000029231 | 5187.024 | -0.509024      | 0.000007 | 0.000409 |
| <b>Sostdc1</b> | ENSMUSG000000036169 | 1056.792 | -0.583204      | 0.000028 | 0.001276 |
| <b>Bmp4</b>    | ENSMUSG000000021835 | 276.550  | -0.752379      | 0.001969 | 0.036465 |
| <b>Eda</b>     | ENSMUSG000000059327 | 125.645  | -0.648440      | 0.002217 | 0.040236 |
| Fst            | ENSMUSG000000021765 | 393.073  | -0.456395      | 0.004985 | 0.073447 |
| Inhba          | ENSMUSG000000041324 | 944.896  | -0.371059      | 0.007682 | 0.097234 |
| Yap1           | ENSMUSG000000053110 | 2155.990 | -0.260643      | 0.015872 | 0.157331 |
| Spry4          | ENSMUSG000000024427 | 312.648  | -0.386442      | 0.016378 | 0.159866 |
| Runx2          | ENSMUSG000000039153 | 1442.066 | -0.261197      | 0.017853 | 0.168808 |
| Barx1          | ENSMUSG000000021381 | 661.294  | -0.269877      | 0.028907 | 0.228161 |
| Pax9           | ENSMUSG00000001497  | 1513.753 | -0.231191      | 0.040367 | 0.279380 |
| Edar           | ENSMUSG00000003227  | 48.260   | -0.740193      | 0.045058 | 0.294635 |
| Bmp2           | ENSMUSG000000027358 | 67.729   | -0.539686      | 0.058984 | 0.339601 |
| Jag2           | ENSMUSG000000002799 | 402.313  | 0.280615       | 0.064589 | 0.355305 |
| Fgfr2          | ENSMUSG000000030849 | 1593.774 | 0.203518       | 0.073533 | 0.381244 |
| Trp63          | ENSMUSG000000022510 | 1239.197 | -0.213861      | 0.077427 | 0.389638 |
| Sp6            | ENSMUSG000000038560 | 243.396  | -0.455061      | 0.079825 | 0.394617 |
| Acvr2a         | ENSMUSG000000052155 | 392.015  | -0.286330      | 0.079945 | 0.394774 |
| Evc            | ENSMUSG000000029122 | 512.253  | 0.220915       | 0.119441 | 0.482374 |
| Chuk           | ENSMUSG000000025199 | 391.518  | 0.241357       | 0.148289 | 0.535945 |
| Msx1           | ENSMUSG000000048450 | 1597.954 | -0.116144      | 0.249078 | 0.668065 |
| Bcl11b         | ENSMUSG000000048251 | 490.290  | -0.152262      | 0.281665 | 0.698493 |
| Ctnna1         | ENSMUSG000000037815 | 2230.010 | -0.085910      | 0.343552 | 0.752505 |
| Bmp7           | ENSMUSG000000008999 | 185.512  | 0.175060       | 0.359283 | 0.762787 |
| Foxi3          | ENSMUSG000000055874 | 109.940  | 0.207778       | 0.403306 | 0.791898 |
| Fgf10          | ENSMUSG000000021732 | 197.830  | -0.153683      | 0.422457 | 0.803655 |
| Bmpr1a         | ENSMUSG000000021796 | 1609.036 | 0.068240       | 0.483999 | 0.839166 |
| Pitx2          | ENSMUSG000000028023 | 717.020  | -0.057882      | 0.658253 | 0.913127 |
| Gas1           | ENSMUSG000000052957 | 499.538  | -0.056887      | 0.703741 | 0.925558 |
| Wnt10a         | ENSMUSG000000026167 | 42.444   | 0.152322       | 0.712022 | 0.928833 |
| Apc            | ENSMUSG000000005871 | 2008.212 | 0.028482       | 0.793381 | 0.948206 |
| Dicer1         | ENSMUSG000000041415 | 1643.814 | -0.025564      | 0.798670 | 0.949471 |
| Msx2           | ENSMUSG000000021469 | 80.878   | 0.069767       | 0.808810 | 0.952988 |
| Ctnnb1         | ENSMUSG000000006932 | 8368.773 | 0.014435       | 0.874369 | 0.974468 |

| Gene    | Gene ID             | baseMean | log2FoldChange | pvalue   | padj     |
|---------|---------------------|----------|----------------|----------|----------|
| Smo     | ENSMUSG00000001761  | 1119.973 | -0.014494      | 0.884361 | 0.976782 |
| Lrp4    | ENSMUSG000000027253 | 1212.486 | 0.012883       | 0.913219 | 0.982982 |
| Edaradd | ENSMUSG000000095105 | 176.398  | 0.006436       | 0.976009 | 0.993924 |
| Rps6ka3 | ENSMUSG000000031309 | 985.009  | 0.000284       | 0.998403 | 0.999149 |

**Table S8.** Simulations comparing the mouse molar pattern with those where growth (*Mgr*) has been increased or activation (*Act*) has been decreased. In rat molar simulation both the parameter values have been changed. Size and patterning area are relative to those of the mouse simulation.

| Simulation         | <i>Mgr</i> | <i>Act</i> | Relative size | Relative patterning area | Enamel knot <i>n</i> |
|--------------------|------------|------------|---------------|--------------------------|----------------------|
| Mouse              | 16000      | 1.6        | 1.0           | 1.0                      | 5                    |
| Mouse + growth     | 160000     | 1.6        | 1.9           | 2.7                      | 7                    |
| Mouse – activation | 16000      | 0.8        | 1.0           | 0.8                      | 4                    |
| Rat                | 160000     | 0.8        | 1.6           | 1.6                      | 5                    |

All the other parameters have identical values in all simulations: Iterations = 14000, Deg = 0.076, Set = 0.95, Sec = 0.14, Ds = 1.0, Da = 0.2, Lbi = 1.34, Bbi = 1.31, Ina = 0.0, Int = 0.19, Inh = 800.0, Di = 0.2, Egr = 0.013, Dgr = 10500.0, Dff = 0.0002, Adh = 0.005, Rep = 1.5, Ntr = 0.00013, Abi = 3.2, Pbi = 7.0, Bgr = 0.2, Boy = 0.17, Rad = 3.0, Swi = 1.51, Bwi = 3.4. For parameters, see Methods and (3, 4). The model can be downloaded at <https://github.com/jernvall-lab/ToothMaker>.



**Table S9.** Measurements of tooth widths at the cap stage, at bell stage, and at the final mineralized size. The late bell stage data was measured when the last cusps have just become visible (only multicusped teeth included). When the required bell stage was between two stages in the data, an average was used. Data is from this study, literature, and from the Museum of Natural History Berlin, Embryological collections (ZMB EMB) and Finnish Museum of Natural History (MZH).

| Stage                       | Species                    | Tooth               | Developmental width |          | Mineralized width |          | Source |    |
|-----------------------------|----------------------------|---------------------|---------------------|----------|-------------------|----------|--------|----|
|                             |                            |                     | µm                  | log10 µm | µm                | log10 µm |        |    |
| Cap                         | <i>Capreolus capreolus</i> | dp/3                | 177                 | 2.249    | 5420              | 3.734    | 1      |    |
|                             | <i>Felis catus</i>         | dp4/                | 162                 | 2.21     | 3100              | 3.491    | 2      |    |
|                             | <i>Homo sapiens</i>        | M1/                 | 187                 | 2.273    | 11500             | 4.061    | 3      |    |
|                             | <i>Loxodonta africana</i>  | M/3 (dp/4)          | 209                 | 2.321    | 48000             | 4.681    | 4      |    |
|                             | <i>Macropus eugenii</i>    | M/1                 | 154                 | 2.188    | 4800              | 3.681    | 5      |    |
|                             | <i>Mus musculus</i>        | M/1                 | 155                 | 2.189    | 950               | 2.98     | 6      |    |
|                             | <i>Mustela erminea</i>     | P4/                 | 174                 | 2.24     | 2600              | 3.42     | 7      |    |
|                             | <i>Mustela putorius</i>    | dp/3                | 172                 | 2.235    | 1220              | 3.087    | 8      |    |
|                             | <i>Ovis aries</i>          | dp4/                | 214                 | 2.331    | 10550             | 4.023    | 9      |    |
|                             |                            | dp/4                | 185                 | 2.266    | 7150              | 3.854    | 9      |    |
|                             | <i>Phocaena sp.</i>        | upper               | 148                 | 2.171    | 2130              | 3.328    | 10     |    |
|                             |                            | lower               | 196                 | 2.293    | 2410              | 3.382    | 10     |    |
|                             | <i>Rattus norvegicus</i>   | M/1                 | 170                 | 2.23     | 1970              | 3.294    | 11     |    |
|                             | <i>Sorex araneus</i>       | P/4                 | 207                 | 2.317    | 644               | 2.809    | 12     |    |
|                             | <i>Sus scrofa</i>          | M1/                 | 193                 | 2.286    | 14200             | 4.151    | 13     |    |
|                             |                            | dp3/                | 177                 | 2.247    | 7900              | 3.898    | 13     |    |
|                             |                            | dp/3                | 154                 | 2.188    | 4670              | 3.669    | 13     |    |
|                             | Bell                       | <i>Felis catus</i>  | dp3/                | 1426     | 3.154             | 3420     | 3.534  | 14 |
|                             |                            |                     | dp/4                | 946      | 2.976             | 1900     | 3.279  | 14 |
|                             |                            | <i>Homo sapiens</i> | M1/                 | 3350     | 3.525             | 11500    | 4.061  | 3  |
| <i>Loxodonta africana</i>   |                            | M/2(dp/3)           | 4850                | 3.686    | 27400             | 4.438    | 4      |    |
|                             |                            | M/2(dp3/)           | 5530                | 3.743    | 31500             | 4.498    | 4      |    |
| <i>Mesocricetus auratus</i> |                            | M/1                 | 630                 | 2.80     | 1410              | 3.149    | 15     |    |
| <i>Macropus eugenii</i>     |                            | M/1                 | 1900                | 3.279    | 4800              | 3.681    | 5      |    |
| <i>Mus musculus</i>         |                            | M/1                 | 596                 | 2.775    | 950               | 2.98     | 6      |    |
| <i>Rattus norvegicus</i>    | M/1                        | 1225                | 3.088               | 1970     | 3.294             | 11       |        |    |

Sources: 1. Developmental: Lab collection, Mineralized: MZH\_UN\_3057; 2. Developmental: Section ZMB\_EMB\_A\_Bolk\_13-2-1, Mineralized: Fig. 3a in (5); 3. Developmental: for cap stage average of Fig. 3c in (6) and Fig. 4a in (7), for bell stage Fig. 7b in (8), Mineralized: average of right and left side measurements in table 1 in (9); 4. Developmental: This study, for cap stage file lox2011-10-1\_headPTA\_01, for bell stage file loxodonta\_2013-7, Mineralized: MZH\_UN\_2845; 5. Developmental: Fig. S3, specimen 3935 and Fig. S4, specimen 4946, Mineralized: Fig. S5, specimen 7275, all in (10); 6. This study; 7. Developmental: section ZMB\_EMB\_B\_Bolk\_8-3-4, Mineralized: MZH\_429; 8. Developmental: Lab collection, slide 0700\_1\_230609\_MJ, Mineralized: MZH\_KN\_47857; 9. Developmental: ZMB\_EMB\_T\_Bolk\_4-4-11, ZMB\_EMB\_S\_Bolk\_5-3-12, Mineralized: MZH\_541\_1960; 10. Developmental: ZMB\_EMB\_D\_Bolk\_7-2-6, ZMB\_EMB\_Bolk\_9-1-5, Mineralized: MZH\_976\_658\_1960; 11. This study; 12. Developmental: Fig 2c, Mineralized: fig. 4b, both in (11); 13. Developmental: ZMB\_EMB\_U\_Bolk\_6-2-3, ZMB\_EMB\_V\_Bolk\_6-2-5, ZMB\_EMB\_V\_Bolk\_5-2-1, Mineralized: MZH reference collections; 14. Developmental: For dp/4 average of Fig 10 and 11, for dp/4 Fig 12, Mineralized: Figs 2a and 18a, all in (5); 15. Developmental: Average of Fig 10e and 10f, Mineralized: Fig. 7a, all in (12).

**Table S10.** Slopes using least-squares (LS) and major axis (MA) regression to estimate the minimum tooth size possible based on the cap-stage data, and the minimum size when the teeth can fully pattern based on the bell-stage data.

| Data and regression | Slope  | Intercept | $r^2$  | $P$    | Minimum tooth size<br>( $\mu\text{m}$ and 95% CI) | Minimum patterning<br>size ( $\mu\text{m}$ and 95% CI) |
|---------------------|--------|-----------|--------|--------|---------------------------------------------------|--------------------------------------------------------|
| Cap stage, LS       | 0.0427 | 2.095     | 0.1626 | 0.1113 | 154.3 (122.5-191.3)                               |                                                        |
| Cap stage, MA       | 0.0431 | 2.093     | 0.1626 | 0.1075 | 153.9 (122.0-191.8)                               |                                                        |
| Bell stage, LS      | 0.6398 | 0.885     | 0.9764 | 0.0001 |                                                   | 286.4 (112.0-502.0)                                    |
| Bell stage, MA      | 0.6443 | 0.869     | 0.9764 | 0.0001 |                                                   | 277.4 (93.3-508.7)                                     |

Slopes and bootstrapped 95 percent confidence intervals were obtained using PAST (13). Major axis regression can be preferable when both variables have error and are in the same units of measurements (14).

## References

1. E. Järvinen, *et al.*, Continuous tooth generation in mouse is induced by activated epithelial Wntbeta-catenin signaling. *Proceedings of the National Academy of Sciences* 103, 18627–18632 (2006).
2. O. Hallikas, *et al.*, System-level analyses of keystone genes required for mammalian tooth development. *J Exp Zool Part B Mol Dev Evol* 336, 7–17 (2021).
3. E. Harjunmaa, *et al.*, Replaying evolutionary transitions from the dental fossil record. *Nature* 512, 44–48 (2014).
4. E. Renvoisé, *et al.*, Mechanical constraint from growing jaw facilitates mammalian dental diversity. *Proc National Acad Sci* 114, 9403–9408 (2017).
5. W. A. Gaunt, The development of the deciduous cheek teeth of the cat. *Acta anat.* 38, 187–212 (1959).
6. M. Hovorakova, H. Lesot, M. Peterka, R. Peterkova, The developmental relationship between the deciduous dentition and the oral vestibule in human embryos. *Anat Embryol* 209, 303–313 (2005).
7. M. Hovorakova, H. Lesot, M. Peterka, R. Peterkova, Early development of the human dentition revisited. *J Anat* 233, 135–145 (2018).
8. P. M. Butler, The prenatal development of the human first upper permanent molar. *Arch Oral Biol* 12, 551–563 (1967).
9. L. Alvesalo, P. M. A. Tigerstedt, Heritabilities of human tooth dimensions. *Hereditas* 77, 311–318 (1974).
10. Q. Nasrullah, M. Renfree, A. R. Evans, From Embryo to Adult: The Complete Development and Unusual Replacement of the Dentition of the Tammar Wallaby (*Macropus eugenii*). *J Mamm Evol* 29, 515–529 (2022).
11. E. Järvinen, K. Välimäki, M. Pummila, I. Thesleff, J. Jernvall, The taming of the shrew milk teeth. *Evol Dev* 10, 477–486 (2008).
12. W. A. Gaunt, The development of the molar pattern of the golden hamster (*Mesocricetus auratus* W.), together with a re-assessment of the molar pattern of the mouse (*Mus musculus*). *Acta anatomica* 45, 219–251 (1961).
13. Ø. Hammer, D. A. T. Harper, P. D. Ryan, PAST: Paleontological statistics software package for education and data analysis. *Palaeontologia Electronica* 4, 9pp (2001).
14. R. R. Sokal, F. J. Rohlf, *Biometry: The Principles and Practice of Statistics in Biological Research*. (Freeman, 1995).
